# Supplementary material for: Synthesis of a self-healable and pH responsive hydrogel based on an ionic polymer/clay nanocomposite
Source: Royal Society of Chemistry journal article supplement (doi:10.1039/c6ra01074a), 2016-01-01
Supplement: c6ra01074a1.pdf [file c6ra01074a1.pdf]

**Supplementary documents**

**Synthesis of self-healable and pH responsive hydrogel based on ionic  
polymer/clay nanocomposite**

Sovan Lal Banerjee<sup>a</sup>, Moumita Khamrai<sup>b</sup>, P. P. Kundu<sup>b</sup>, Nikhil K. Singha<sup>a\*</sup>

<sup>a</sup> Rubber Technology Centre, Indian Institute of Technology, Kharagpur, India.

<sup>b</sup>Department of Polymer Science and Technology, University of Calcutta, Kolkata, India.

**1. XRD analysis:**

The XRD pattern of the MMT and OMMT was explained in Figure S2. From the figure it was observed that for MMT and OMMT strong peak was observed at  $2\theta = 6.10^\circ$  and  $5.49^\circ$  respectively which confirmed the modification of pristine MMT with CTAB<sup>1</sup>.

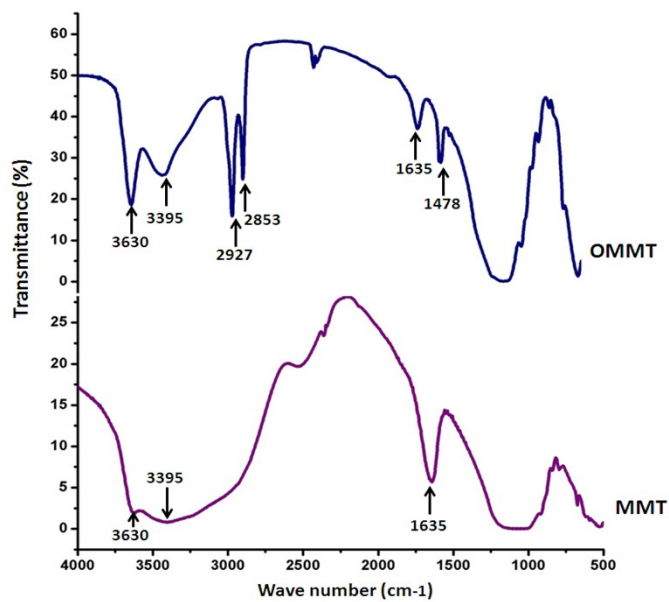

**Figure S1:** FTIR spectroscopy analysis of (a) NaMMT and (b) CTAB modified MMT.

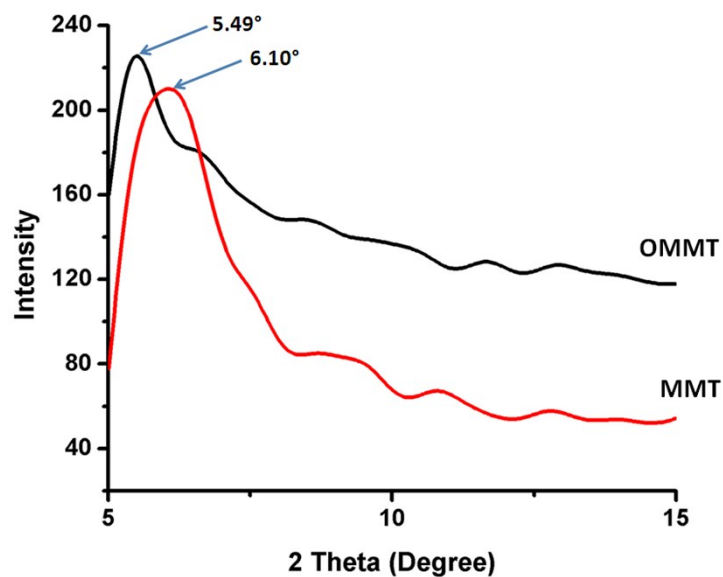

**Figure S2:** XRD analysis of MMT and OMMT clay.

30 **References:**

31 1. H. Li, Y. Yu and Y. Yang, European Polymer Journal, 2005, **41**, 2016-2022.

32

33
